# Supplementary material for: Oxidation Products of Tryptophan and Proline in Adipokinetic Hormones—Artifacts or Post-Translational Modifications?
Source: MDPI journal article supplement (doi:10.3390/life13122315), 2023-12-10
Supplement: s1 [file s1]

# Oxidation products of tryptophan and proline in adipokinetic hormones – artefacts or posttranslational modifications?

Simone König<sup>1\*</sup> Heather G. Marco<sup>2#</sup>, Gerd Gäde<sup>2#</sup>

<sup>1</sup> IZKF Core Unit Proteomics, Interdisciplinary Center for Clinical Research, University of Münster, Röntgenstr. 21, 48149 Münster, Germany; koenigs@uni-muenster.de (S.K.)

<sup>2</sup> Department of Biological Sciences, University of Cape Town, Private Bag, ZA-7700 Rondebosch/Cape Town, South Africa; heather.marco@uct.ac.za (H.G.M.); gerd.gade@uct.ac.za (G.G.)

# Shared first authors

\* Correspondence: koenigs@uni-muenster.de

|            |            |            |            |            |            |            |            |
|------------|------------|------------|------------|------------|------------|------------|------------|
| <b>b</b>   | 211.108    | 325.151    | 472.220    | 559.252    | 656.304    | 713.326    | –          |
| <b>i</b>   | 72.081     | 87.056     | 120.081    | 60.045     | 70.066     | 30.034     | 159.092    |
| <b>b~</b>  | 193.098    | 307.141    | 454.209    | 541.241    | 638.294    | 695.315    | –          |
| <b>b*</b>  | 194.082    | 308.125    | 455.193    | 542.225    | 639.278    | 696.299    | –          |
|            | 1          | 2          | 3          | 4          | 5          | 6          | 7          |
|            | <b>Val</b> | <b>Asn</b> | <b>Phe</b> | <b>Ser</b> | <b>Pro</b> | <b>Gly</b> | <b>Trp</b> |
|            | 7          | 6          | 5          | 4          | 3          | 2          | 1          |
| <b>y''</b> | –          | 706.331    | 592.288    | 445.220    | 358.188    | 261.135    | 204.114    |
| <b>y~</b>  | –          | 688.321    | 574.278    | 427.209    | 340.177    | 243.125    | 186.103    |
| <b>y*</b>  | –          | 689.305    | 575.262    | 428.193    | 341.161    | 244.109    | 187.087    |

  

|            |            |            |            |            |            |            |            |
|------------|------------|------------|------------|------------|------------|------------|------------|
| <b>b</b>   | 211.108    | 325.151    | 472.220    | 559.252    | 672.299    | 729.321    | –          |
| <b>i</b>   | 72.081     | 87.056     | 120.081    | 60.045     | 86.061     | 30.034     | 159.092    |
| <b>b~</b>  | 193.098    | 307.141    | 454.209    | 541.241    | 654.289    | 711.310    | –          |
| <b>b*</b>  | 194.082    | 308.125    | 455.193    | 542.225    | 655.273    | 712.294    | –          |
|            | 1          | 2          | 3          | 4          | 5          | 6          | 7          |
|            | <b>Val</b> | <b>Asn</b> | <b>Phe</b> | <b>Ser</b> | <b>Hyp</b> | <b>Gly</b> | <b>Trp</b> |
|            | 7          | 6          | 5          | 4          | 3          | 2          | 1          |
| <b>y''</b> | –          | 722.326    | 608.283    | 461.215    | 374.183    | 261.135    | 204.114    |
| <b>y~</b>  | –          | 704.316    | 590.273    | 443.204    | 356.172    | 243.125    | 186.103    |
| <b>y*</b>  | –          | 705.300    | 591.257    | 444.188    | 357.156    | 244.109    | 187.087    |

**Figure S1.** Calculation of the expected fragment ions for sequences pQVNFSPGWa and pQVNFSP(Hyp)GWa of a peptide assigned to Manto-CC (Hyp) in *K. flavicollis* using MassLynx (blocked termini: pQ and amidation). Note that “~” and “\*” refer to the water and ammonia neutral losses.

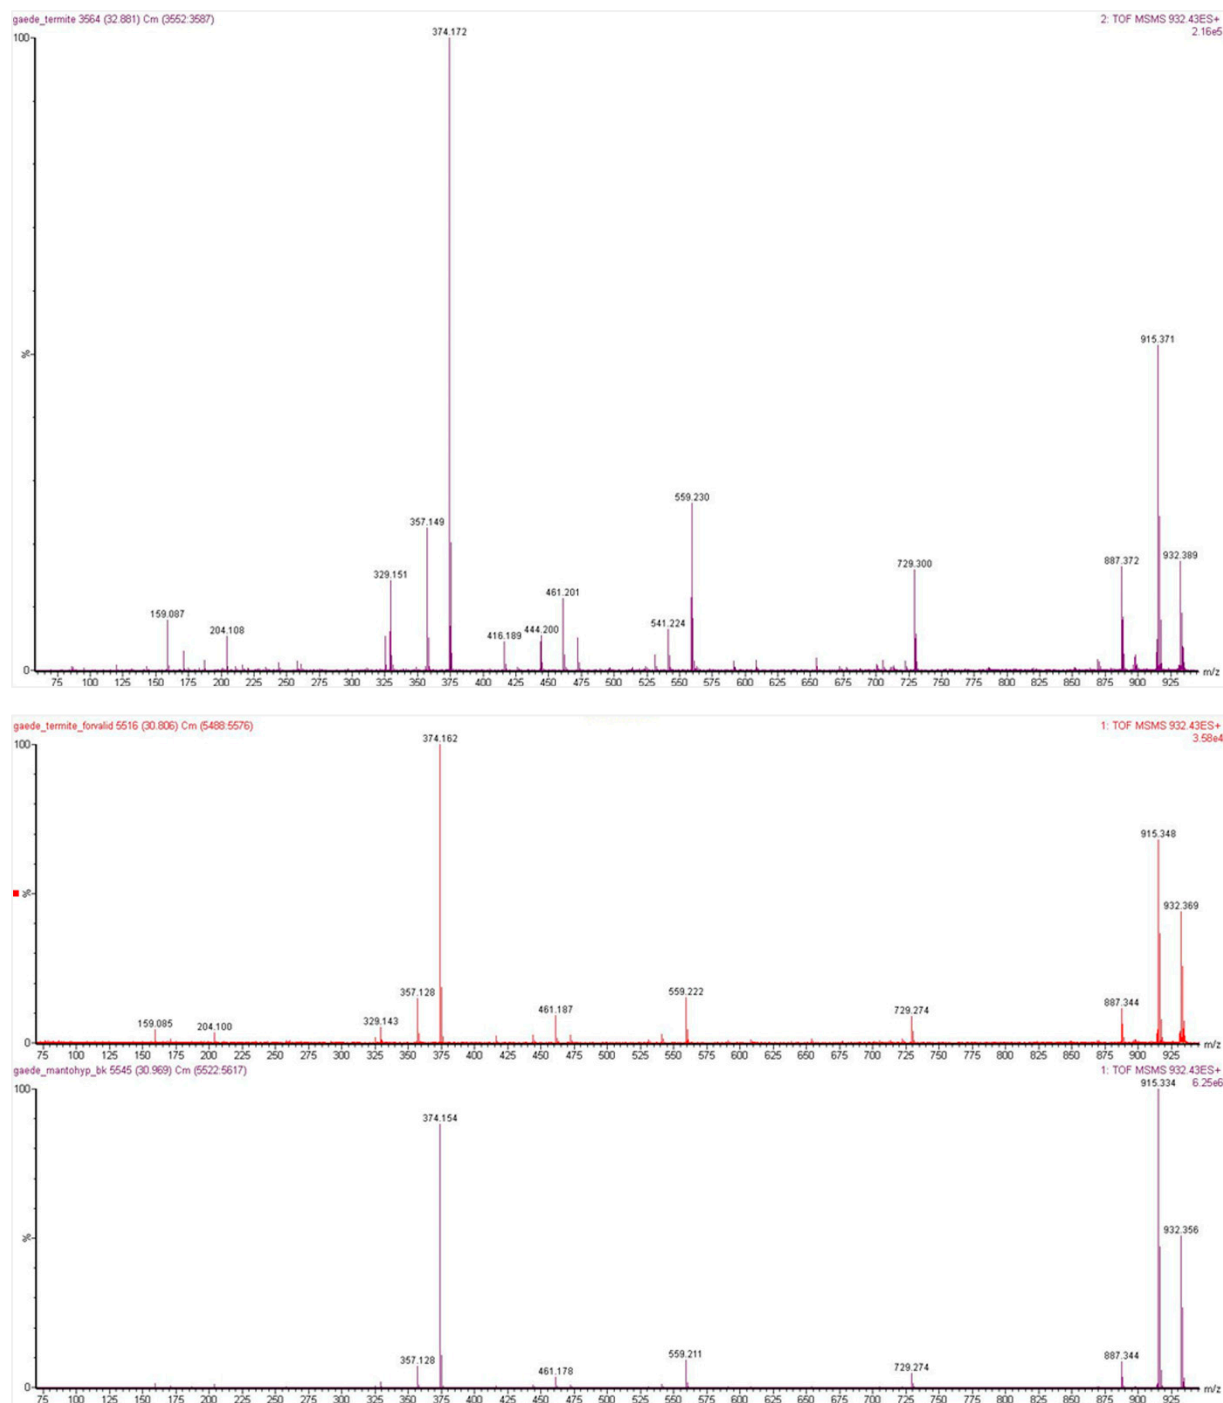

**Figure S2.** CID spectrum of the singly-charged ion of a peptide assigned to Manto-CC (Hyp) in *K. flavicollis* (top spectrum for Fig. 3 main text). Bottom two spectra: Its validation with the synthetic compound (top trace: termite CC extract, bottom trace: synthetic reference compound).

|           |            |            |            |            |            |            |            |            |            |
|-----------|------------|------------|------------|------------|------------|------------|------------|------------|------------|
| <b>b</b>  | 211.108    | 325.151    | 472.220    | 559.252    | 672.299    | 729.321    | 915.400    | 972.422    | -          |
| <b>i</b>  | 72.081     | 87.056     | 120.081    | 60.045     | 86.061     | 30.034     | 159.092    | 30.034     | 74.061     |
| <b>b~</b> | 193.098    | 307.141    | 454.209    | 541.241    | 654.289    | 711.310    | 897.390    | 954.411    | -          |
| <b>b*</b> | 194.082    | 308.125    | 455.193    | 542.225    | 655.273    | 712.294    | 898.374    | 955.395    | -          |
|           | 1          | 2          | 3          | 4          | 5          | 6          | 7          | 8          | 9          |
|           | <b>Val</b> | <b>Asn</b> | <b>Phe</b> | <b>Ser</b> | <b>Hyp</b> | <b>Gly</b> | <b>Trp</b> | <b>Gly</b> | <b>Thr</b> |
|           | 9          | 8          | 7          | 6          | 5          | 4          | 3          | 2          | 1          |
| <b>y"</b> | -          | 880.395    | 766.352    | 619.284    | 532.252    | 419.204    | 362.183    | 176.104    | 119.082    |
| <b>y~</b> | -          | 862.385    | 748.342    | 601.273    | 514.241    | 401.194    | 344.172    | 158.093    | 101.071    |
| <b>y*</b> | -          | 863.369    | 749.326    | 602.257    | 515.225    | 402.178    | 345.156    | 159.077    | 102.055    |

**Figure S3.** Calculation of the expected fragment ions for sequence pQVNFSP(Hyp)GWGTa of a peptide assigned to Bladi-HrTH (Hyp) using MassLynx (blocked termini: pQ and amidation). Note that “~” and “\*” refer to the water and ammonia neutral losses.

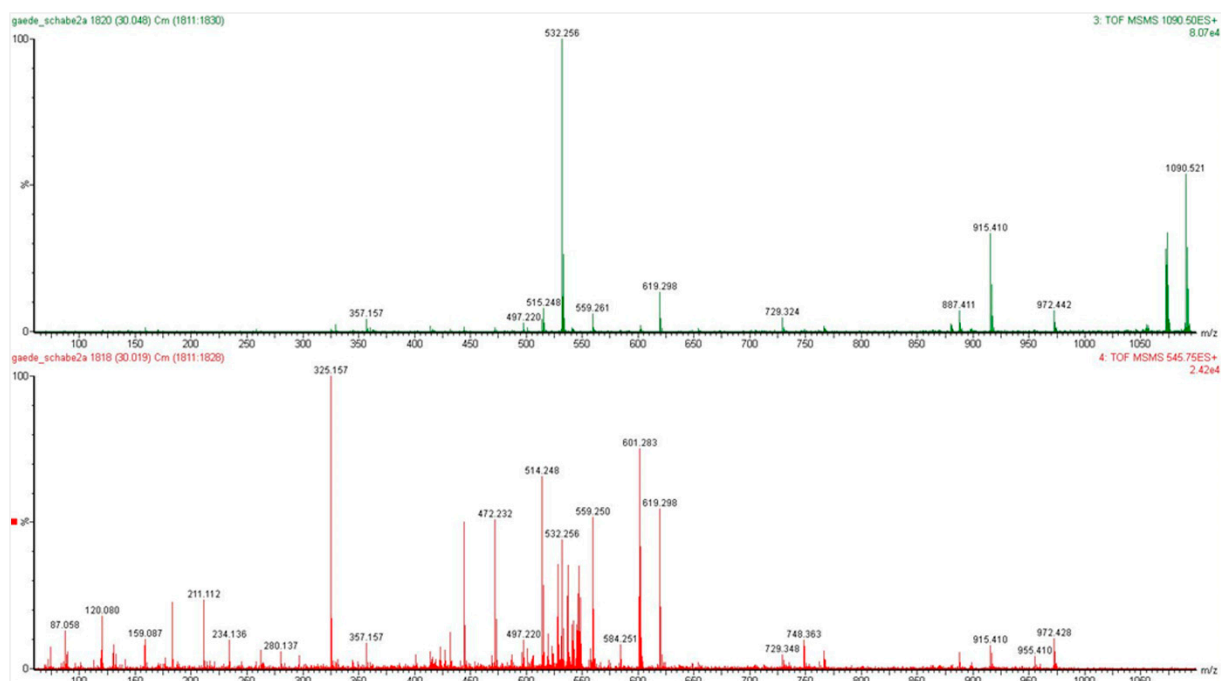

**Figure S4.** MS/MS analysis for Bladi-HrTH (Hyp) in *X. cavicola* for the singly- and the doubly-charged peptide ions ( $m/z$  1090.50, top trace, and  $m/z$  545.75, bottom trace; see Fig. 4 main text).

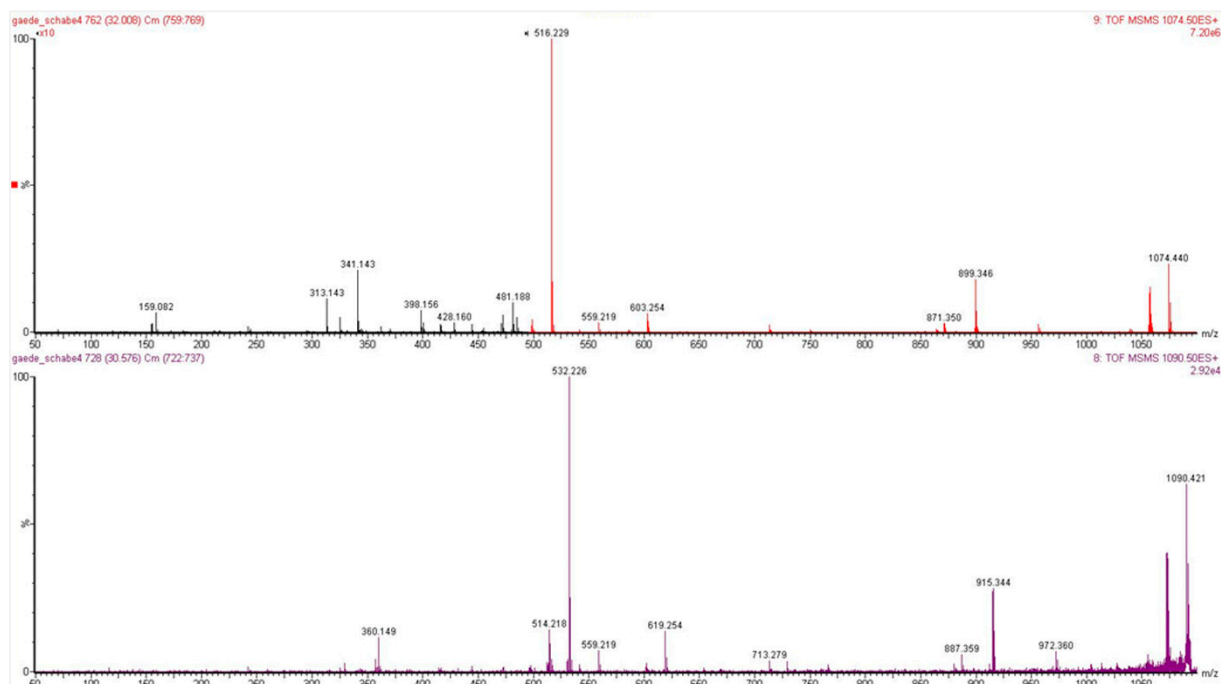

**Figure S5.** MS/MS analysis for Bladi-HrTH (top trace) and its Hyp form in *Eublaberus posticus* for the singly-charged peptide ions.

|            |            |            |            |            |            |            |            |            |            |
|------------|------------|------------|------------|------------|------------|------------|------------|------------|------------|
| <b>b</b>   | 225.124    | 339.167    | 486.235    | 573.267    | 686.315    | 743.336    | 929.416    | 986.437    | -          |
| <b>i</b>   | 86.097     | 87.056     | 120.081    | 60.045     | 86.061     | 30.034     | 159.092    | 30.034     | 74.061     |
| <b>b~</b>  | 207.113    | 321.156    | 468.225    | 555.257    | 668.305    | 725.326    | 911.405    | 968.427    | -          |
| <b>b*</b>  | 208.097    | 322.140    | 469.209    | 556.241    | 669.289    | 726.310    | 912.389    | 969.411    | -          |
|            | 1          | 2          | 3          | 4          | 5          | 6          | 7          | 8          | 9          |
|            | <b>Leu</b> | <b>Asn</b> | <b>Phe</b> | <b>Ser</b> | <b>Hyp</b> | <b>Gly</b> | <b>Trp</b> | <b>Gly</b> | <b>Thr</b> |
|            | 9          | 8          | 7          | 6          | 5          | 4          | 3          | 2          | 1          |
| <b>y''</b> | -          | 880.395    | 766.352    | 619.284    | 532.252    | 419.204    | 362.183    | 176.104    | 119.082    |
| <b>y~</b>  | -          | 862.385    | 748.342    | 601.273    | 514.241    | 401.194    | 344.172    | 158.093    | 101.071    |
| <b>y*</b>  | -          | 863.369    | 749.326    | 602.257    | 515.225    | 402.178    | 345.156    | 159.077    | 102.055    |

**Figure S6.** Calculation of the expected fragment ions for sequence pQLNFSP(Hyp)GWGTa of a peptide assigned to Panni-HrTH (Hyp) using MassLynx (blocked termini: pQ and amidation). Note that "~" and "\*" refer to the water and ammonia neutral losses.

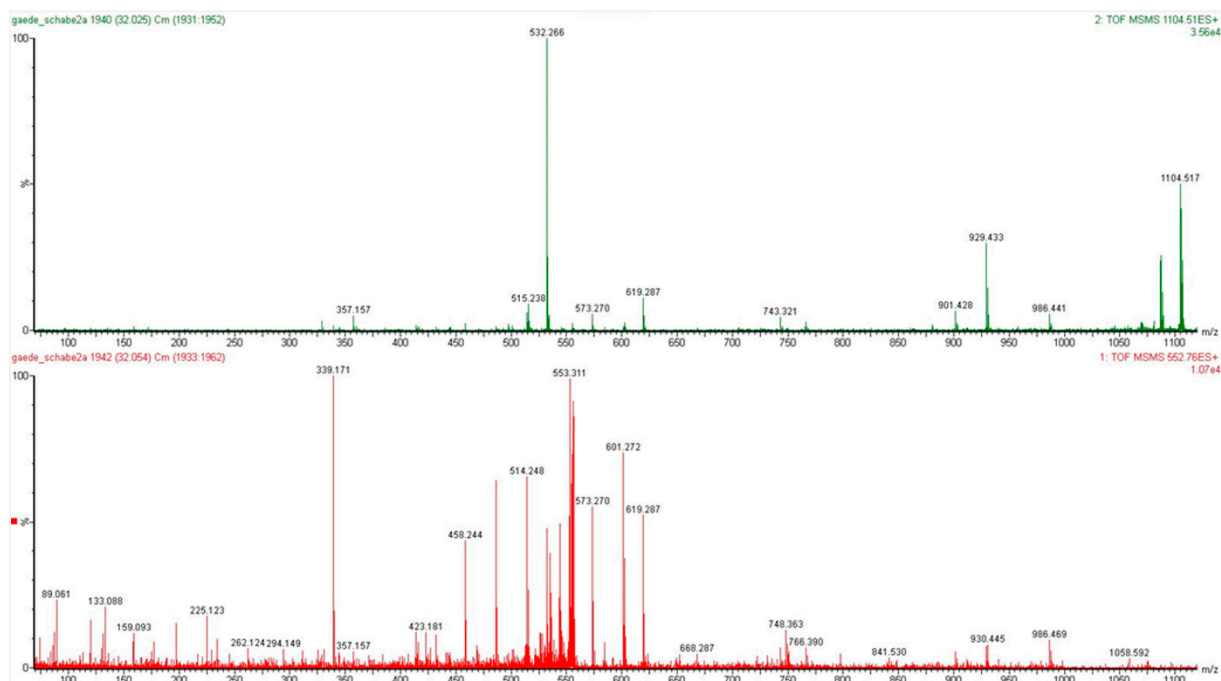

**Figure S7.** MS/MS analysis for the singly- and the doubly-charged peptide ions ( $m/z$  1104.51, top trace, and  $m/z$  552.76) of a peptide assigned to Panni-HrTH (Hyp) in *P. nivea* (see Fig. 5 main text).

|            |         |         |         |         |         |         |         |         |         |
|------------|---------|---------|---------|---------|---------|---------|---------|---------|---------|
| <b>b</b>   | 225.124 | 339.167 | 486.235 | 573.267 | 686.315 | 743.336 | 929.416 | 986.437 | -       |
| <b>i</b>   | 86.097  | 87.056  | 120.081 | 60.045  | 86.061  | 30.034  | 159.092 | 30.034  | 72.081  |
| <b>b~</b>  | 207.113 | 321.156 | 468.225 | 555.257 | 668.305 | 725.326 | 911.405 | 968.427 | -       |
| <b>b*</b>  | 208.097 | 322.140 | 469.209 | 556.241 | 669.289 | 726.310 | 912.389 | 969.411 | -       |
|            | 1       | 2       | 3       | 4       | 5       | 6       | 7       | 8       | 9       |
|            | Leu     | Asn     | Phe     | Ser     | Hyp     | Gly     | Trp     | Gly     | Val     |
|            | 9       | 8       | 7       | 6       | 5       | 4       | 3       | 2       | 1       |
| <b>y''</b> | -       | 878.416 | 764.373 | 617.305 | 530.273 | 417.225 | 360.204 | 174.124 | 117.103 |
| <b>y~</b>  | -       | 860.406 | 746.363 | 599.294 | 512.262 | 399.214 | 342.193 | 156.114 | 99.092  |
| <b>y*</b>  | -       | 861.390 | 747.347 | 600.278 | 513.246 | 400.198 | 343.177 | 157.098 | 100.076 |

  

|            |         |         |         |         |         |         |         |         |         |
|------------|---------|---------|---------|---------|---------|---------|---------|---------|---------|
| <b>b</b>   | 225.124 | 339.167 | 486.235 | 573.267 | 686.315 | 743.336 | 929.416 | 986.437 | -       |
| <b>i</b>   | 86.097  | 87.056  | 120.081 | 60.045  | 86.061  | 30.034  | 159.092 | 30.034  | 120.081 |
| <b>b~</b>  | 207.113 | 321.156 | 468.225 | 555.257 | 668.305 | 725.326 | 911.405 | 968.427 | -       |
| <b>b*</b>  | 208.097 | 322.140 | 469.209 | 556.241 | 669.289 | 726.310 | 912.389 | 969.411 | -       |
|            | 1       | 2       | 3       | 4       | 5       | 6       | 7       | 8       | 9       |
|            | Leu     | Asn     | Phe     | Ser     | Hyp     | Gly     | Trp     | Gly     | Phe     |
|            | 9       | 8       | 7       | 6       | 5       | 4       | 3       | 2       | 1       |
| <b>y''</b> | -       | 926.416 | 812.373 | 665.305 | 578.273 | 465.225 | 408.204 | 222.124 | 165.103 |
| <b>y~</b>  | -       | 908.406 | 794.363 | 647.294 | 560.262 | 447.214 | 390.193 | 204.114 | 147.092 |
| <b>y*</b>  | -       | 909.390 | 795.347 | 648.278 | 561.246 | 448.198 | 391.177 | 205.098 | 148.076 |

**Figure S8.** Calculation of the expected fragment ions for sequence pQLNFSP(Hyp)GWGVa of a peptide assigned to Asiky-HrTH (Hyp) and sequence pQLNFSP(Hyp)GWGFa for Blaat-HrTH (Hyp) using MassLynx (blocked termini: pQ and amidation). Note that "~" and "\*" refer to the water and ammonia neutral losses.



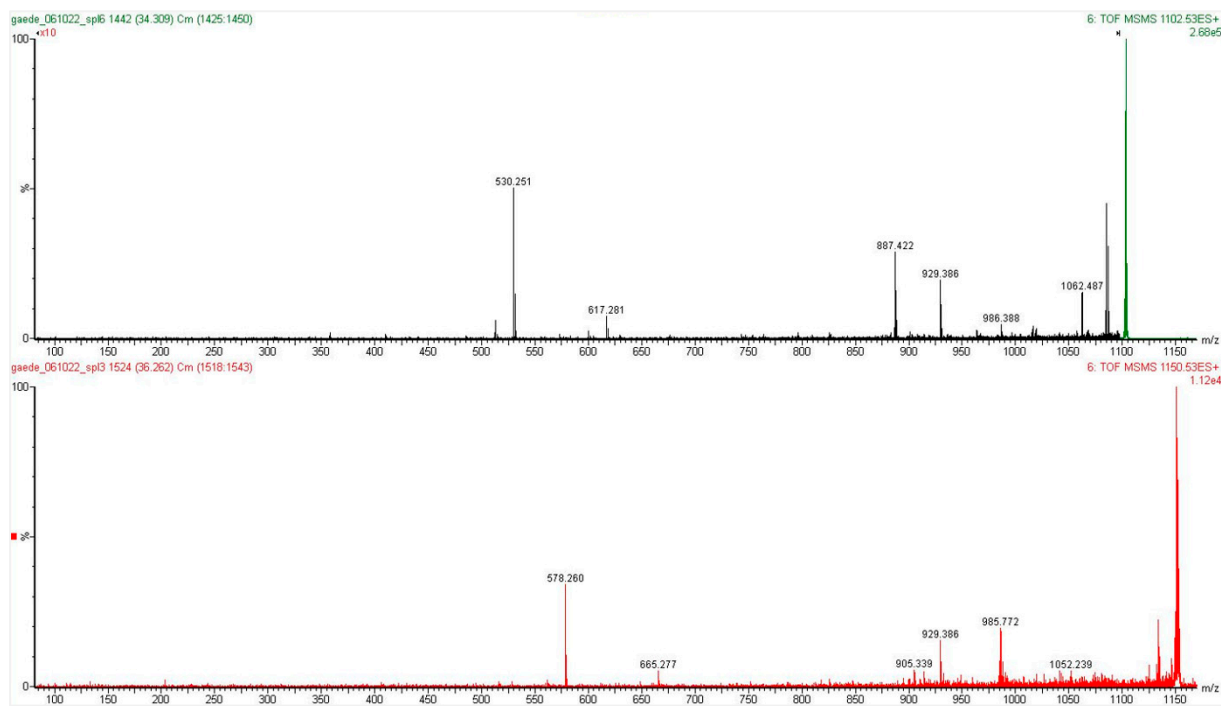

**Figure S9.** MS/MS analysis for the singly-charged peptide ions of peptides assigned to Asiky-HrTH (Hyp) in *Asiablatta kytensis* (top trace) and Blaath-HrTH (Hyp) in *Blaberus atropos* (bottom trace).

|           |         |         |         |         |         |         |         |         |         |
|-----------|---------|---------|---------|---------|---------|---------|---------|---------|---------|
| <b>b</b>  | 225.124 | 339.167 | 486.235 | 573.267 | 686.315 | 743.336 | 929.416 | 986.437 | -       |
| <b>i</b>  | 86.097  | 87.056  | 120.081 | 60.045  | 86.061  | 30.034  | 159.092 | 30.034  | 70.066  |
| <b>b~</b> | 207.113 | 321.156 | 468.225 | 555.257 | 668.305 | 725.326 | 911.405 | 968.427 | -       |
| <b>b*</b> | 208.097 | 322.140 | 469.209 | 556.241 | 669.289 | 726.310 | 912.389 | 969.411 | -       |
|           | 1       | 2       | 3       | 4       | 5       | 6       | 7       | 8       | 9       |
|           | Leu     | Asn     | Phe     | Ser     | Hyp     | Gly     | Trp     | Gly     | Pro     |
|           | 9       | 8       | 7       | 6       | 5       | 4       | 3       | 2       | 1       |
| <b>y"</b> | -       | 876.400 | 762.357 | 615.289 | 528.257 | 415.209 | 358.188 | 172.109 | 115.087 |
| <b>y~</b> | -       | 858.390 | 744.347 | 597.279 | 510.246 | 397.199 | 340.177 | 154.098 | 97.077  |
| <b>y*</b> | -       | 859.374 | 745.331 | 598.263 | 511.230 | 398.183 | 341.161 | 155.082 | 98.061  |

**Figure S10.** Calculation of the expected fragment ions for sequence pQLNFSP(Hyp)GWGP<sub>a</sub> of a peptide assigned to Episu-HrTH (Hyp) using MassLynx (blocked termini: pQ and amidation). Note that "~" and "\*" refer to the water and ammonia neutral losses.

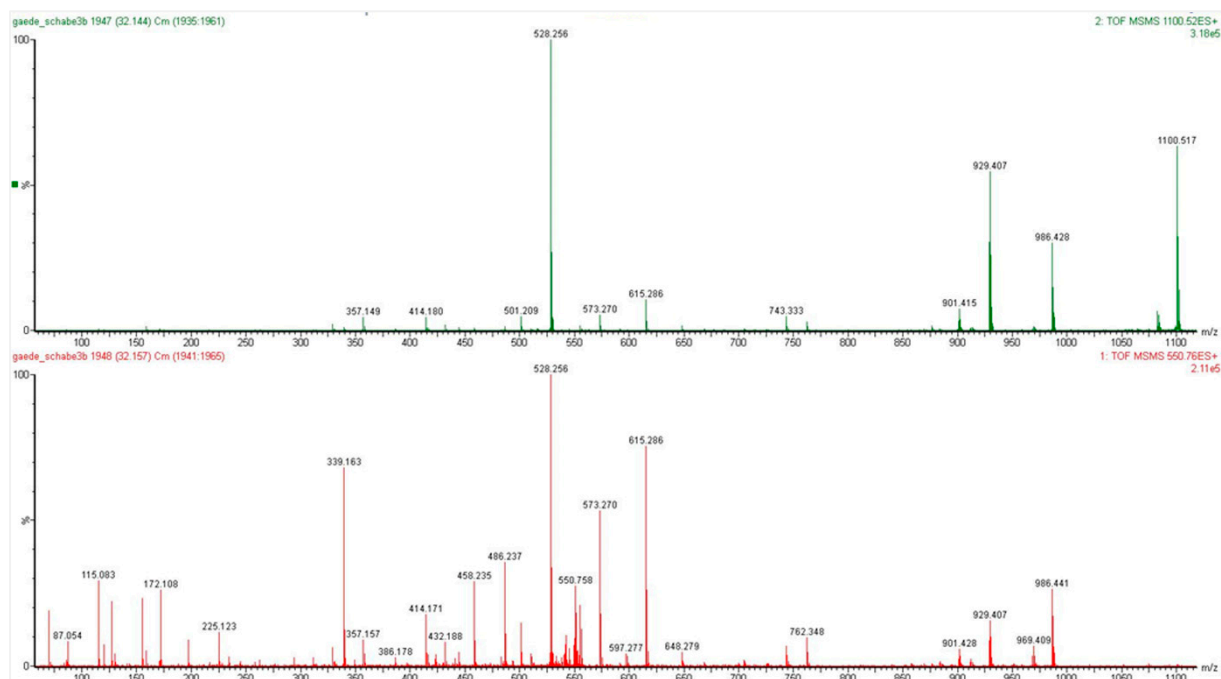

**Figure S11.** MS/MS analysis for the singly- and the doubly-charged peptide ions ( $m/z$  1100.52, top trace, and  $m/z$  550.76) of a peptide assigned to Epis-HrTH (Hyp) in *Episymphloe undaica* (bottom trace, see Fig. 6 main text).

|           |         |         |         |         |         |         |         |
|-----------|---------|---------|---------|---------|---------|---------|---------|
| <b>b</b>  | 225.124 | 339.167 | 486.235 | 573.267 | 686.315 | 800.358 | -       |
| <b>i</b>  | 86.097  | 87.056  | 120.081 | 60.045  | 86.061  | 87.056  | 159.092 |
| <b>b~</b> | 207.113 | 321.156 | 468.225 | 555.257 | 668.305 | 782.347 | -       |
| <b>b*</b> | 208.097 | 322.140 | 469.209 | 556.241 | 669.289 | 783.331 | -       |
|           | 1       | 2       | 3       | 4       | 5       | 6       | 7       |
|           | Leu     | Asn     | Phe     | Ser     | Hyp     | Asn     | Trp     |
|           | 7       | 6       | 5       | 4       | 3       | 2       | 1       |
| <b>y"</b> | -       | 779.348 | 665.305 | 518.236 | 431.204 | 318.157 | 204.114 |
| <b>y~</b> | -       | 761.337 | 647.294 | 500.226 | 413.194 | 300.146 | 186.103 |
| <b>y*</b> | -       | 762.321 | 648.278 | 501.210 | 414.178 | 301.130 | 187.087 |

**Figure S12.** Calculation of the expected fragment ions for sequence pQLNFSP(Hyp)NWa of a peptide assigned to Tenmo-HrTH (Hyp) using MassLynx (blocked termini: pQ and amidation). Note that "~" and "\*" refer to the water and ammonia neutral losses.

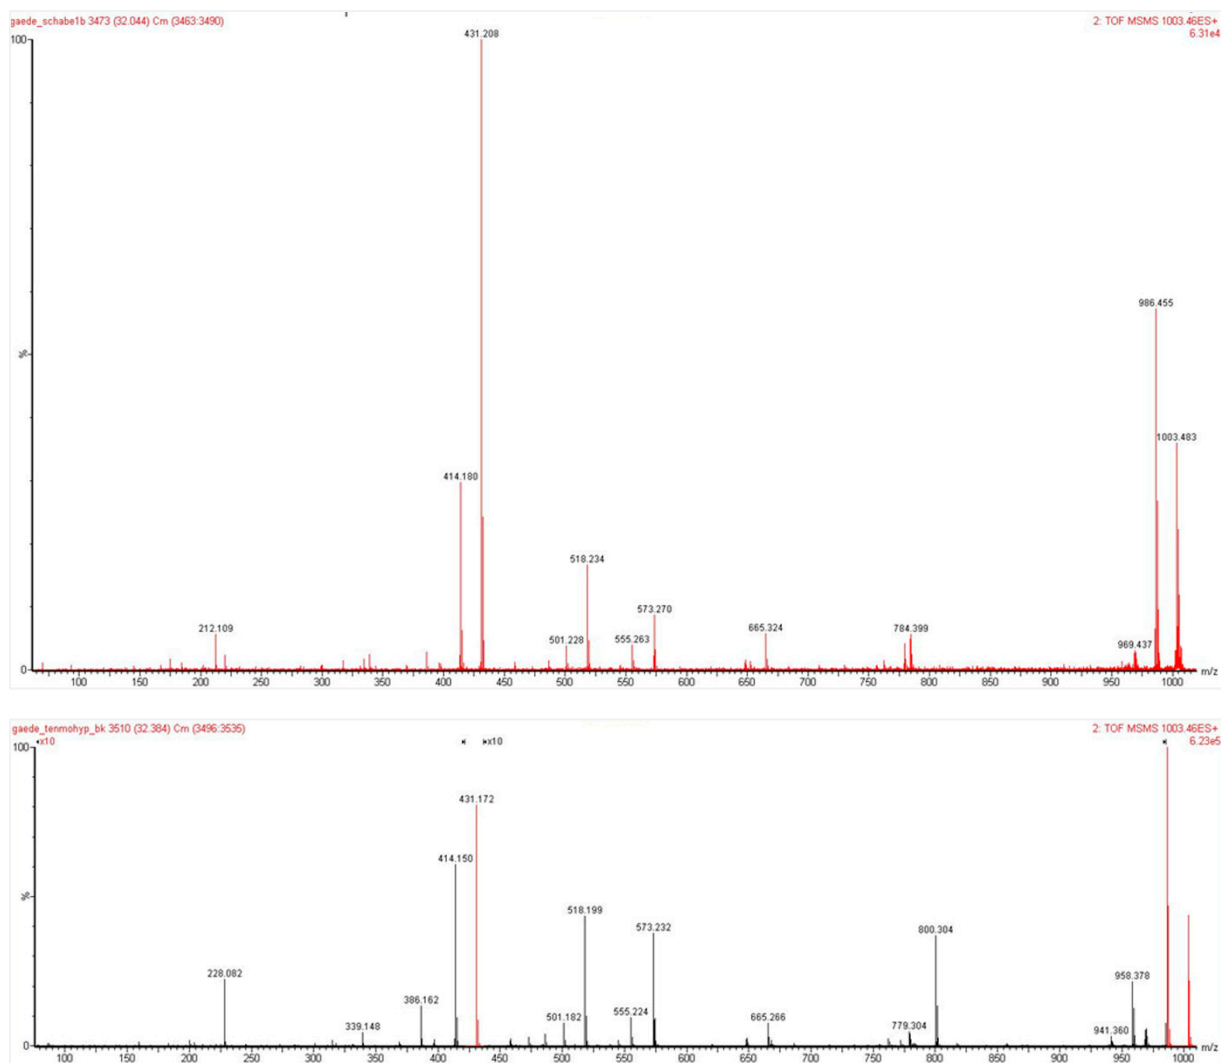

**Figure S13.** CID spectrum of the singly-charged ion of a peptide assigned to Tenmo-HrTH (Hyp) in *E. capucina* (upper trace) and its validation with the synthetic compound (bottom spectrum).



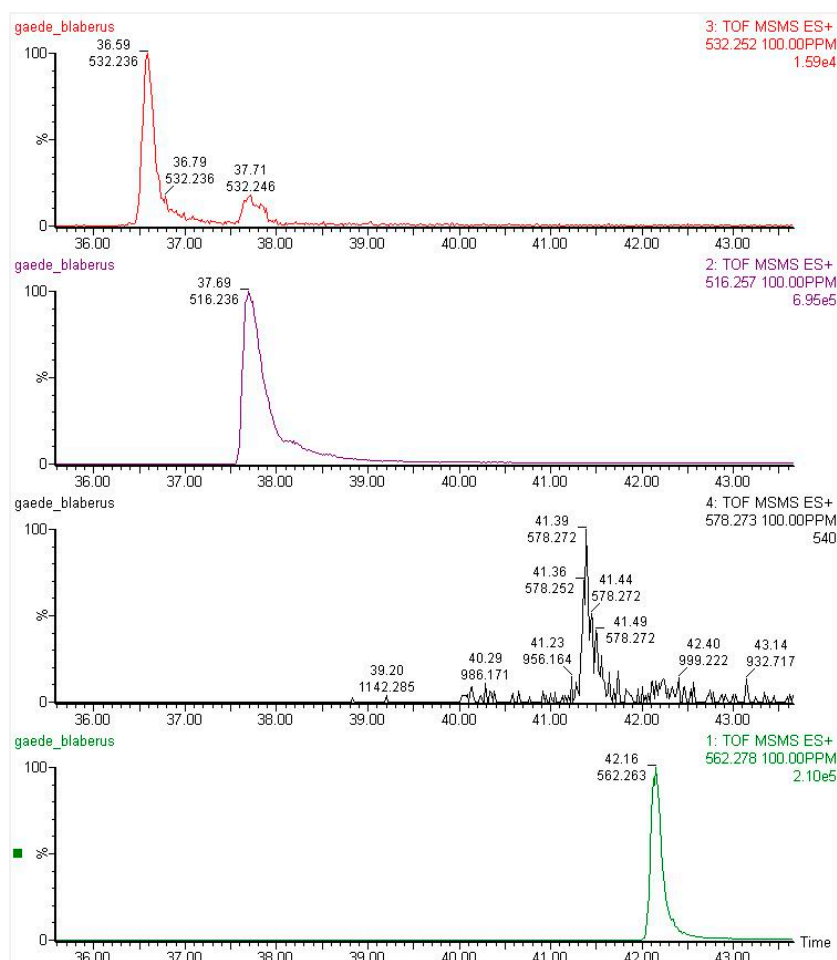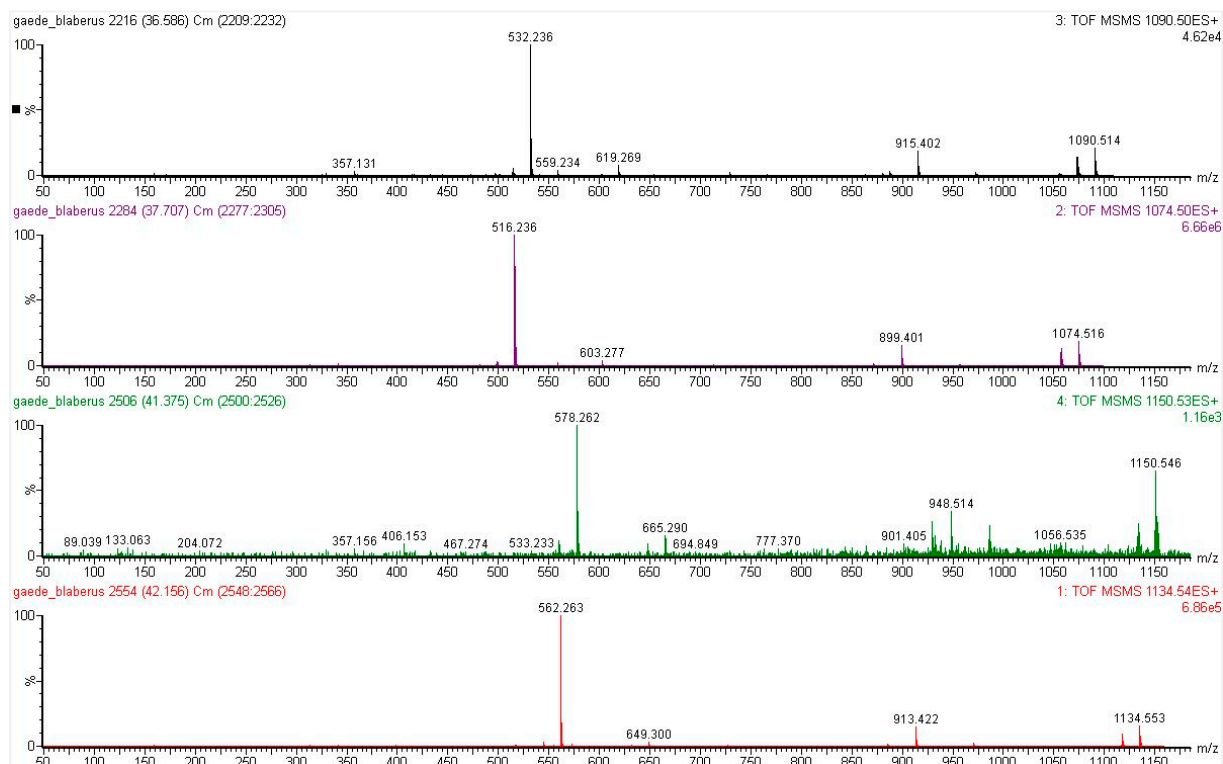

**Figure S14.** LC-MS for the analysis of freshly prepared *Blaberus* CC. Extracted  $y^5$  ion traces (top box) and CID spectra. From the bottom in each box: Blaet-HrTH and its Hyp form, Bladi-HrTH and its Hyp form. For expected fragment ions, see Figures S3, S8.

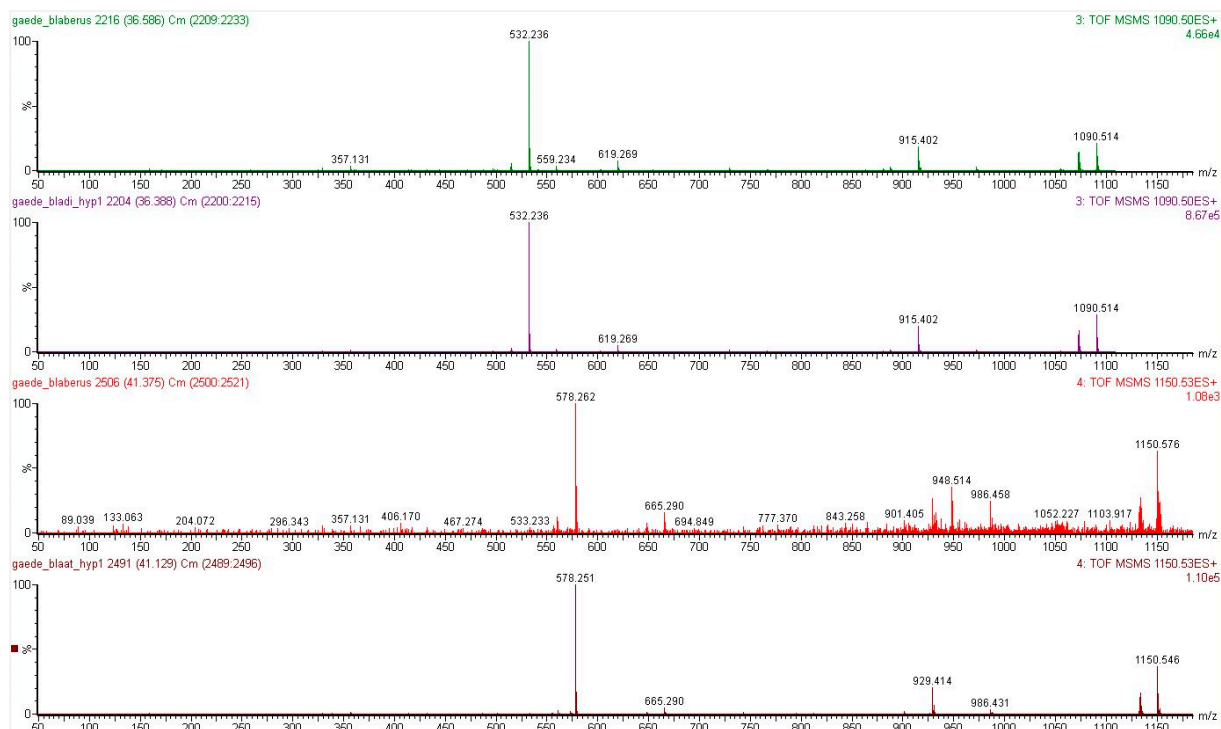

**Figure S15.** CID spectra for the validation of the Hyp forms of Bladi- and Blaati-HrTH from freshly prepared *Blaberus* CC using the synthetic peptides. From the bottom: synthetic Blaati-HrTH (Hyp) and endogenous peptide, synthetic Bladi-HrTH (Hyp) and endogenous peptide. For expected fragment ions, see Figures S3, S8.

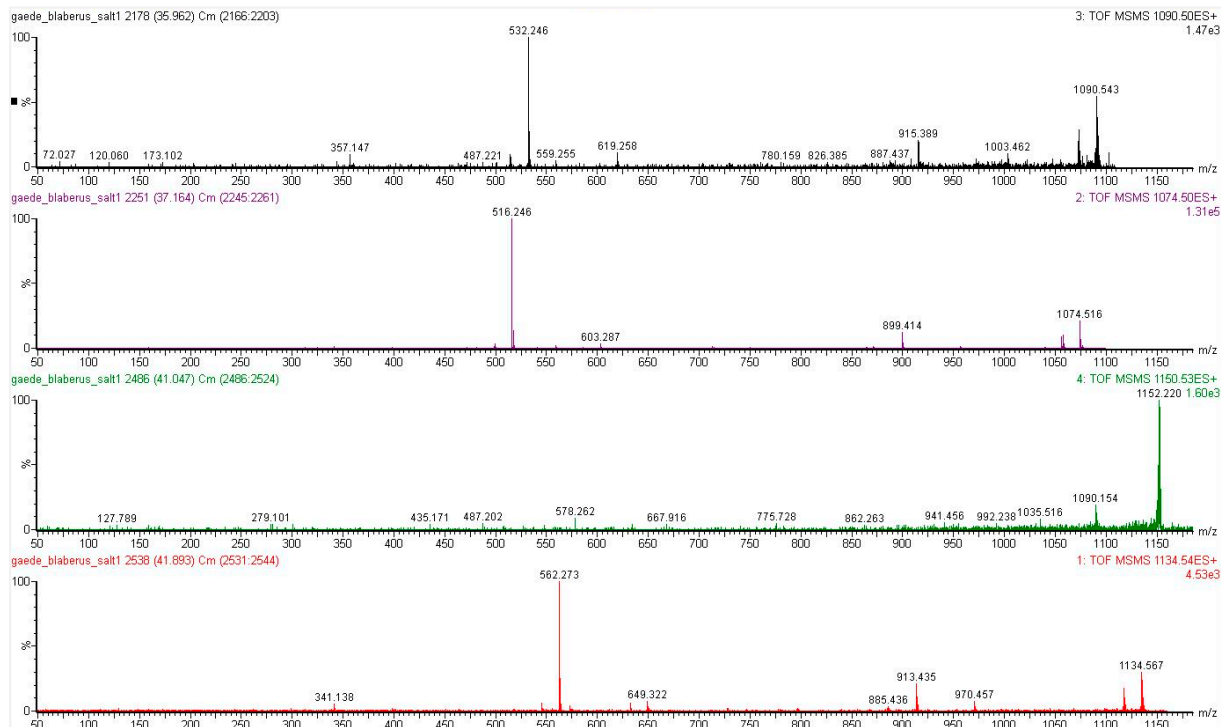

**Figure S16.** CID spectra for the analysis of freshly prepared *Blaberus* CC extracted with saline. From the bottom: Blaati-HrTH and its Hyp form, Bladi-HrTH and its Hyp form. For expected fragment ions, see Figures S3, S8.

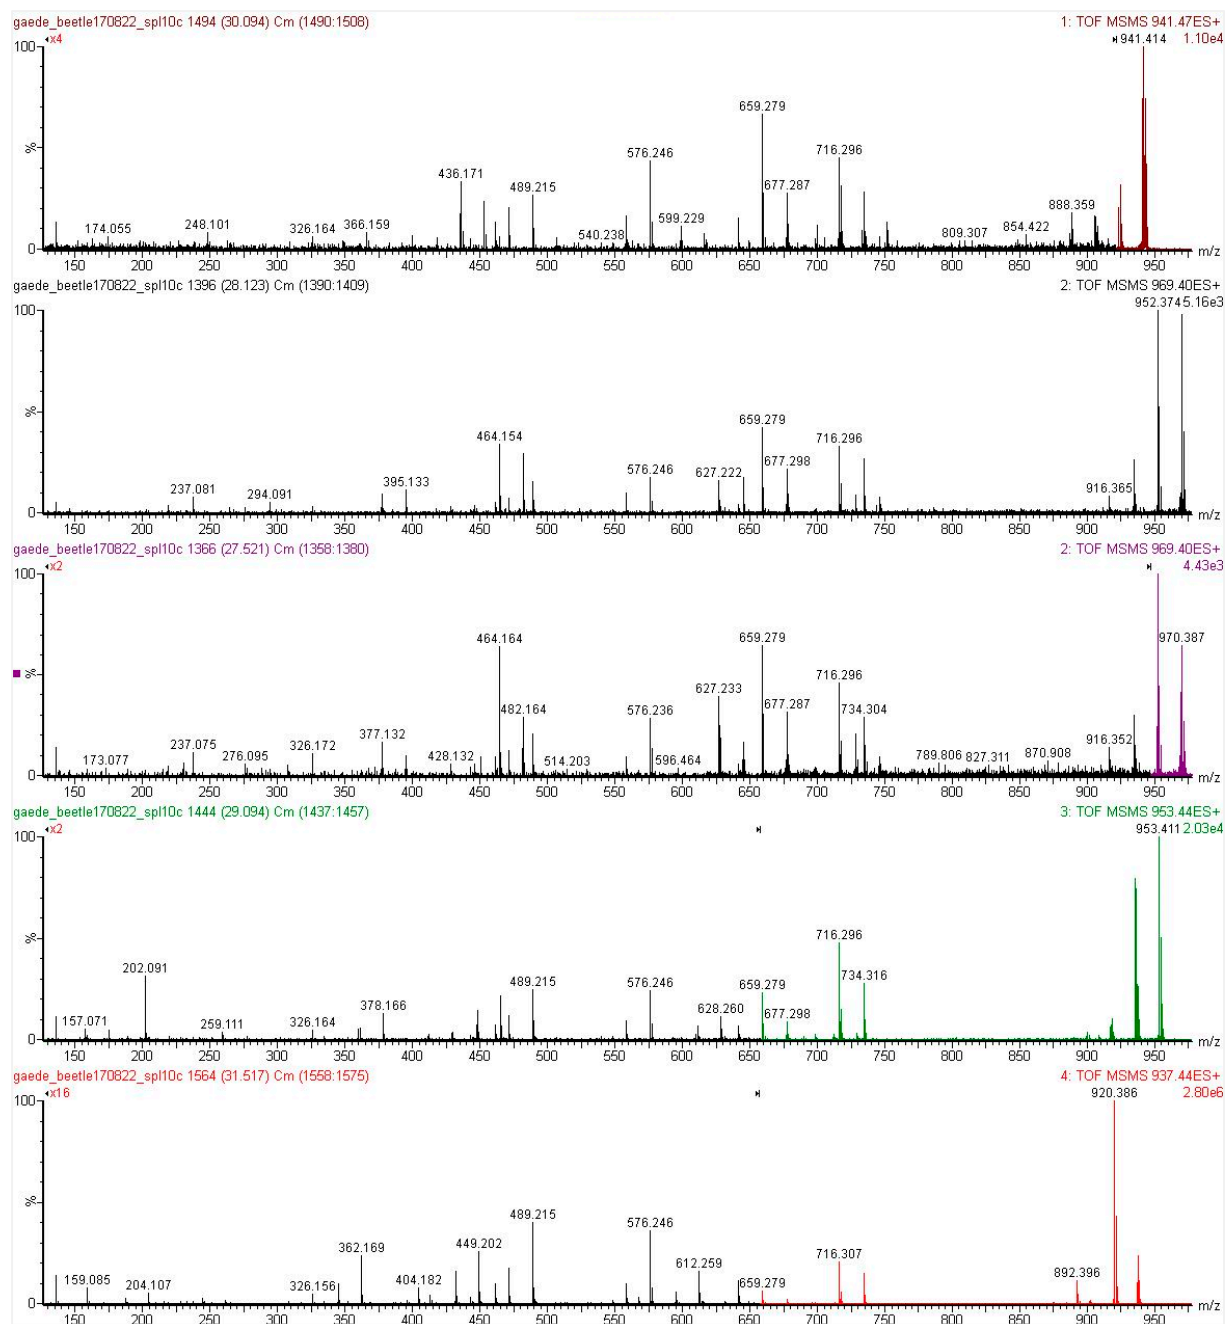

**Figure S17.** CID spectra of the singly-charged ions of a peptide assigned to Nicve-AKH in *N. orbicollis* (A) and its singly- (B) and doubly-oxidized (C, D) as well as the Kyn-form (E) (see Fig. 8 main text).

|           |            |            |            |            |            |            |            |
|-----------|------------|------------|------------|------------|------------|------------|------------|
| <b>b</b>  | 225.124    | 326.172    | 489.235    | 576.267    | 677.315    | 734.336    | -          |
| <b>i</b>  | 86.097     | 74.061     | 136.076    | 60.045     | 74.061     | 30.034     | 159.092    |
| <b>b~</b> | 207.113    | 308.161    | 471.224    | 558.256    | 659.304    | 716.326    | -          |
| <b>b*</b> | 208.097    | 309.145    | 472.208    | 559.240    | 660.288    | 717.310    | -          |
|           | 1          | 2          | 3          | 4          | 5          | 6          | 7          |
|           | <b>Ile</b> | <b>Thr</b> | <b>Tyr</b> | <b>Ser</b> | <b>Thr</b> | <b>Gly</b> | <b>Trp</b> |
|           | 7          | 6          | 5          | 4          | 3          | 2          | 1          |
| <b>y"</b> | -          | 713.326    | 612.278    | 449.215    | 362.183    | 261.135    | 204.114    |
| <b>y~</b> | -          | 695.315    | 594.268    | 431.204    | 344.172    | 243.125    | 186.103    |
| <b>y*</b> | -          | 696.299    | 595.252    | 432.188    | 345.156    | 244.109    | 187.087    |

|           |            |            |            |            |            |            |            |
|-----------|------------|------------|------------|------------|------------|------------|------------|
| <b>b</b>  | 225.124    | 326.172    | 489.235    | 576.267    | 677.315    | 734.336    | -          |
| <b>i</b>  | 86.097     | 74.061     | 136.076    | 60.045     | 74.061     | 30.034     | 175.087    |
| <b>b~</b> | 207.113    | 308.161    | 471.224    | 558.256    | 659.304    | 716.326    | -          |
| <b>b*</b> | 208.097    | 309.145    | 472.208    | 559.240    | 660.288    | 717.310    | -          |
|           | 1          | 2          | 3          | 4          | 5          | 6          | 7          |
|           | <b>Ile</b> | <b>Thr</b> | <b>Tyr</b> | <b>Ser</b> | <b>Thr</b> | <b>Gly</b> | <b>Wox</b> |
|           | 7          | 6          | 5          | 4          | 3          | 2          | 1          |
| <b>y"</b> | -          | 729.321    | 628.273    | 465.210    | 378.178    | 277.130    | 220.109    |
| <b>y~</b> | -          | 711.310    | 610.262    | 447.199    | 360.167    | 259.119    | 202.098    |
| <b>y*</b> | -          | 712.294    | 611.246    | 448.183    | 361.151    | 260.103    | 203.082    |

|           |            |            |            |            |            |            |             |
|-----------|------------|------------|------------|------------|------------|------------|-------------|
| <b>b</b>  | 225.124    | 326.172    | 489.235    | 576.267    | 677.315    | 734.336    | -           |
| <b>i</b>  | 86.097     | 74.061     | 136.076    | 60.045     | 74.061     | 30.034     | 191.082     |
| <b>b~</b> | 207.113    | 308.161    | 471.224    | 558.256    | 659.304    | 716.326    | -           |
| <b>b*</b> | 208.097    | 309.145    | 472.208    | 559.240    | 660.288    | 717.310    | -           |
|           | 1          | 2          | 3          | 4          | 5          | 6          | 7           |
|           | <b>Ile</b> | <b>Thr</b> | <b>Tyr</b> | <b>Ser</b> | <b>Thr</b> | <b>Gly</b> | <b>W2ox</b> |
|           | 7          | 6          | 5          | 4          | 3          | 2          | 1           |
| <b>y"</b> | -          | 745.316    | 644.268    | 481.205    | 394.173    | 293.125    | 236.103     |
| <b>y~</b> | -          | 727.305    | 626.257    | 463.194    | 376.162    | 275.114    | 218.093     |
| <b>y*</b> | -          | 728.289    | 627.241    | 464.178    | 377.146    | 276.098    | 219.077     |

|           |            |            |            |            |            |            |            |
|-----------|------------|------------|------------|------------|------------|------------|------------|
| <b>b</b>  | 225.124    | 326.172    | 489.235    | 576.267    | 677.315    | 734.336    | -          |
| <b>i</b>  | 86.097     | 74.061     | 136.076    | 60.045     | 74.061     | 30.034     | 163.124    |
| <b>b~</b> | 207.113    | 308.161    | 471.224    | 558.256    | 659.304    | 716.326    | -          |
| <b>b*</b> | 208.097    | 309.145    | 472.208    | 559.240    | 660.288    | 717.310    | -          |
|           | 1          | 2          | 3          | 4          | 5          | 6          | 7          |
|           | <b>Ile</b> | <b>Thr</b> | <b>Tyr</b> | <b>Ser</b> | <b>Thr</b> | <b>Gly</b> | <b>Kyn</b> |
|           | 7          | 6          | 5          | 4          | 3          | 2          | 1          |
| <b>y"</b> | -          | 717.357    | 616.309    | 453.246    | 366.214    | 265.166    | 208.145    |
| <b>y~</b> | -          | 699.347    | 598.299    | 435.236    | 348.204    | 247.156    | 190.134    |
| <b>y*</b> | -          | 700.331    | 599.283    | 436.220    | 349.188    | 248.140    | 191.118    |

**Figure S18.** Calculation of the expected fragment ions for sequence pQITYSTGNW<sub>a</sub> of a peptide assigned to Nive-AKH using MassLynx (blocked termini: pQ and amidation) and its oxidation products (W + O, W + 2O, Kyn). Note that "~" and "\*" refer to the water and ammonia neutral losses.
